# Supplementary material for: Glycation Interferes with the Activity of the Bi-Functional UDP-N-Acetylglucosamine 2-Epimerase/N-Acetyl-mannosamine Kinase (GNE)
Source: MDPI journal article supplement (doi:10.3390/biom13030422), 2023-02-23
Supplement: s1 [file s1]

## Supplementary material of the article

### **Glycation interferes with the activity of the bi-functional UDP-*N*-acetylglucosamine 2 - epimerase/*N*-acetylmannosamine kinase (GNE)**

Vanessa Hagenhaus<sup>1</sup>, Jacob L. Gorenflos López<sup>2,3</sup>, Rebecca Rosenstengel<sup>1</sup>, Carolin Neu<sup>1</sup>, Christian P. R. Hackenberger<sup>2,3</sup>, Arif Celik<sup>2,3</sup>, Klara Weinert<sup>1</sup>, Mai-Binh Nguyen<sup>1</sup>, Kaya Bork<sup>1</sup>, Rüdiger Horstkorte<sup>1</sup>, and Astrid Gesper<sup>1\*</sup>

1. Institute for Physiological Chemistry, Medical Faculty, Martin-Luther-University Halle-Wittenberg, 06114 Halle (Saale), Germany

2. Leibniz-Forschungsinstitut für Molekulare Pharmakologie im Forschungsverbund Berlin e.V. (FMP), Campus Berlin-Buch, Robert-Roessle-Str. 10, 13125 Berlin, Germany

3. Humboldt Universität zu Berlin, Institut für Chemie, Brook-Taylor-Str. 2, 12489 Berlin, Germany

Supplementary Table S1:

Anti-CML Western blot-band intensities normalized to Ponceau:

| UDP- <i>N</i> -acetylglucosamine 2- epimerase |           |            |             |             |
|-----------------------------------------------|-----------|------------|-------------|-------------|
| MGO                                           | 0 mM MGO  | 0.5 mM MGO | 2 mM MGO    | 5 mM MGO    |
| mean/b.i.                                     | 1.00 b.i. | 4.64 b.i.  | 10.58 b.i.  | 25.77 b.i.  |
| standard deviation/b.i.                       | 0.00 b.i. | 1.43 b.i.  | 6.23 b.i.   | 15.18 b.i.  |
| GO                                            | 0 mM GO   | 0.5 mM GO  | 2 mM GO     | 5 mM GO     |
| mean/b.i.                                     | 1.00 b.i. | 22.29 b.i. | 79.86 b.i.  | 170.89 b.i. |
| standard deviation/b.i.                       | 0.00 b.i. | 16.93 b.i. | 23.33 b.i.  | 89.16 b.i.  |
| <i>N</i> -acetylmannosamine kinase            |           |            |             |             |
| MGO                                           | 0 mM MGO  | 0.5 mM MGO | 2 mM MGO    | 5 mM MGO    |
| mean/b.i.                                     | 1.00 b.i. | 4.23 b.i.  | 72.89 b.i.  | 165.25 b.i. |
| standard deviation/b.i.                       | 0.00 b.i. | 2.03 b.i.  | 56.82 b.i.  | 128.03 b.i. |
| GO                                            | 0 mM GO   | 0.5 mM GO  | 2 mM GO     | 5 mM GO     |
| mean/b.i.                                     | 1.00 b.i. | 66.18 b.i. | 282.48 b.i. | 518.37 b.i. |
| standard deviation/b.i.                       | 0.00 b.i. | 6.78 b.i.  | 57.10 b.i.  | 51.41 b.i.  |
| <i>N</i> -acetylglucosamine kinase            |           |            |             |             |
| MGO                                           | 0 mM MGO  | 0.5 mM MGO | 2 mM MGO    | 5 mM MGO    |
| mean/b.i.                                     | 1.00 b.i. | 14.11 b.i. | 53.23 b.i.  | 95.25 b.i.  |
| standard deviation/b.i.                       | 0.00 b.i. | 5.65 b.i.  | 23.84 b.i.  | 82.21 b.i.  |
| GO                                            | 0 mM GO   | 0.5 mM GO  | 2 mM GO     | 5 mM GO     |
| mean/b.i.                                     | 1.00 b.i. | 1.90 b.i.  | 16.25 b.i.  | 94.76 b.i.  |
| standard deviation/b.i.                       | 0.00 b.i. | 0.18 b.i.  | 3.50 b.i.   | 13.68 b.i.  |

Supplementary Figure S1:

UDP-*N*-acetylglucosamine 2-epimerase (GNE-epimerase domain):

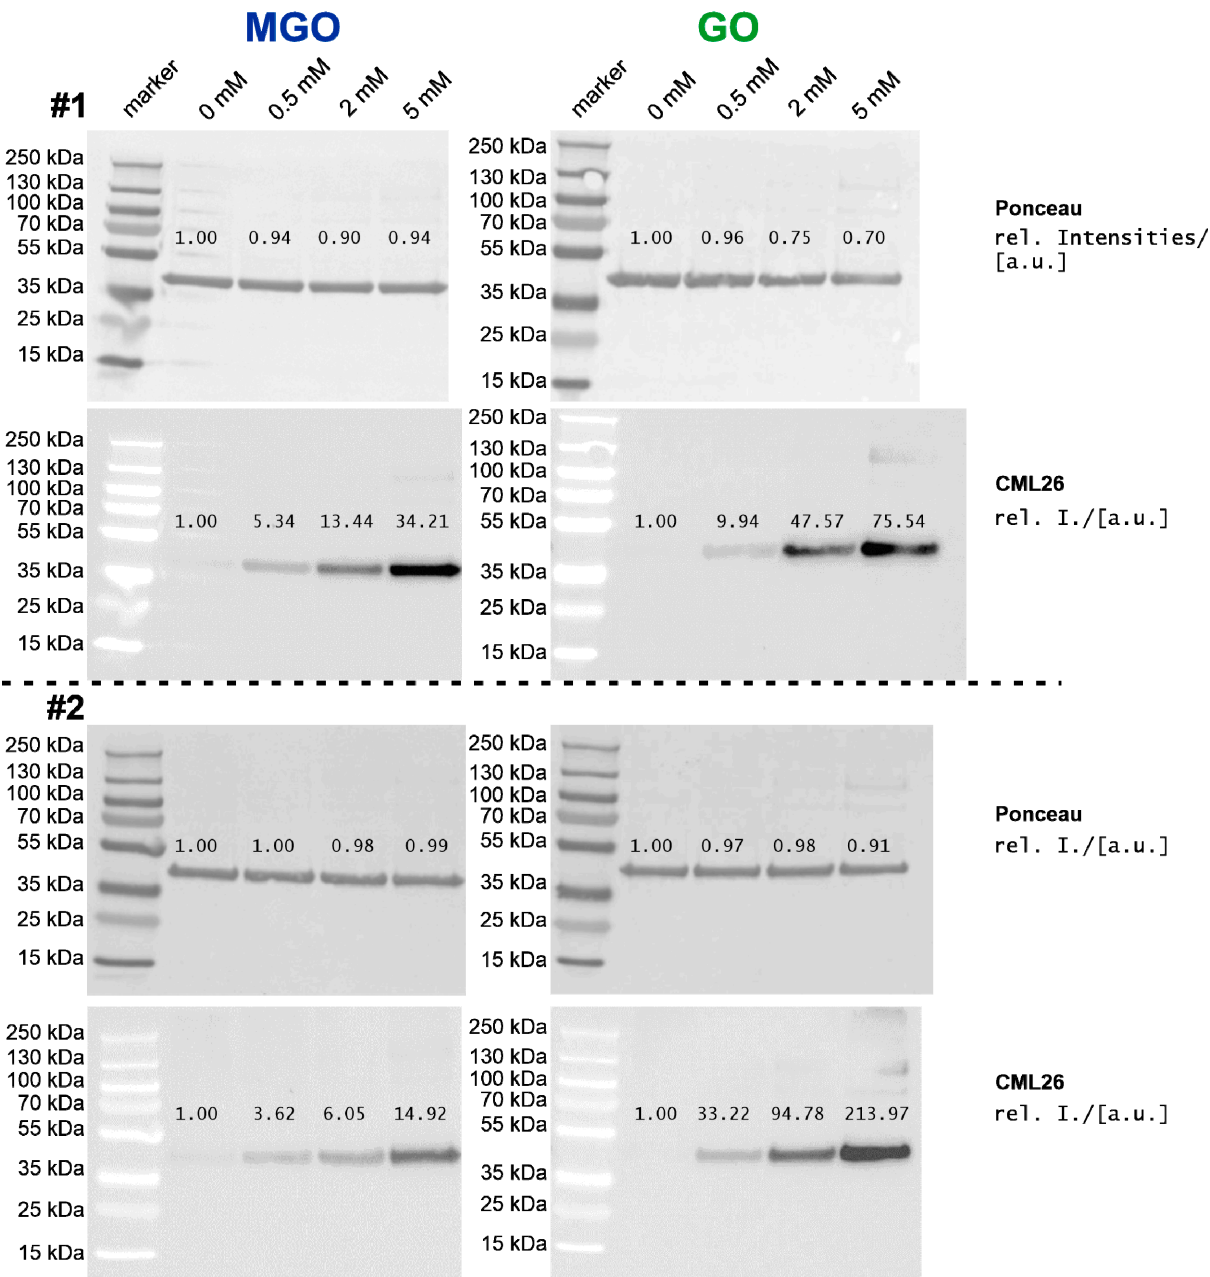

Supplementary Figure S2:

*N*-acetylmannosamine kinase (GNE-kinase domain):

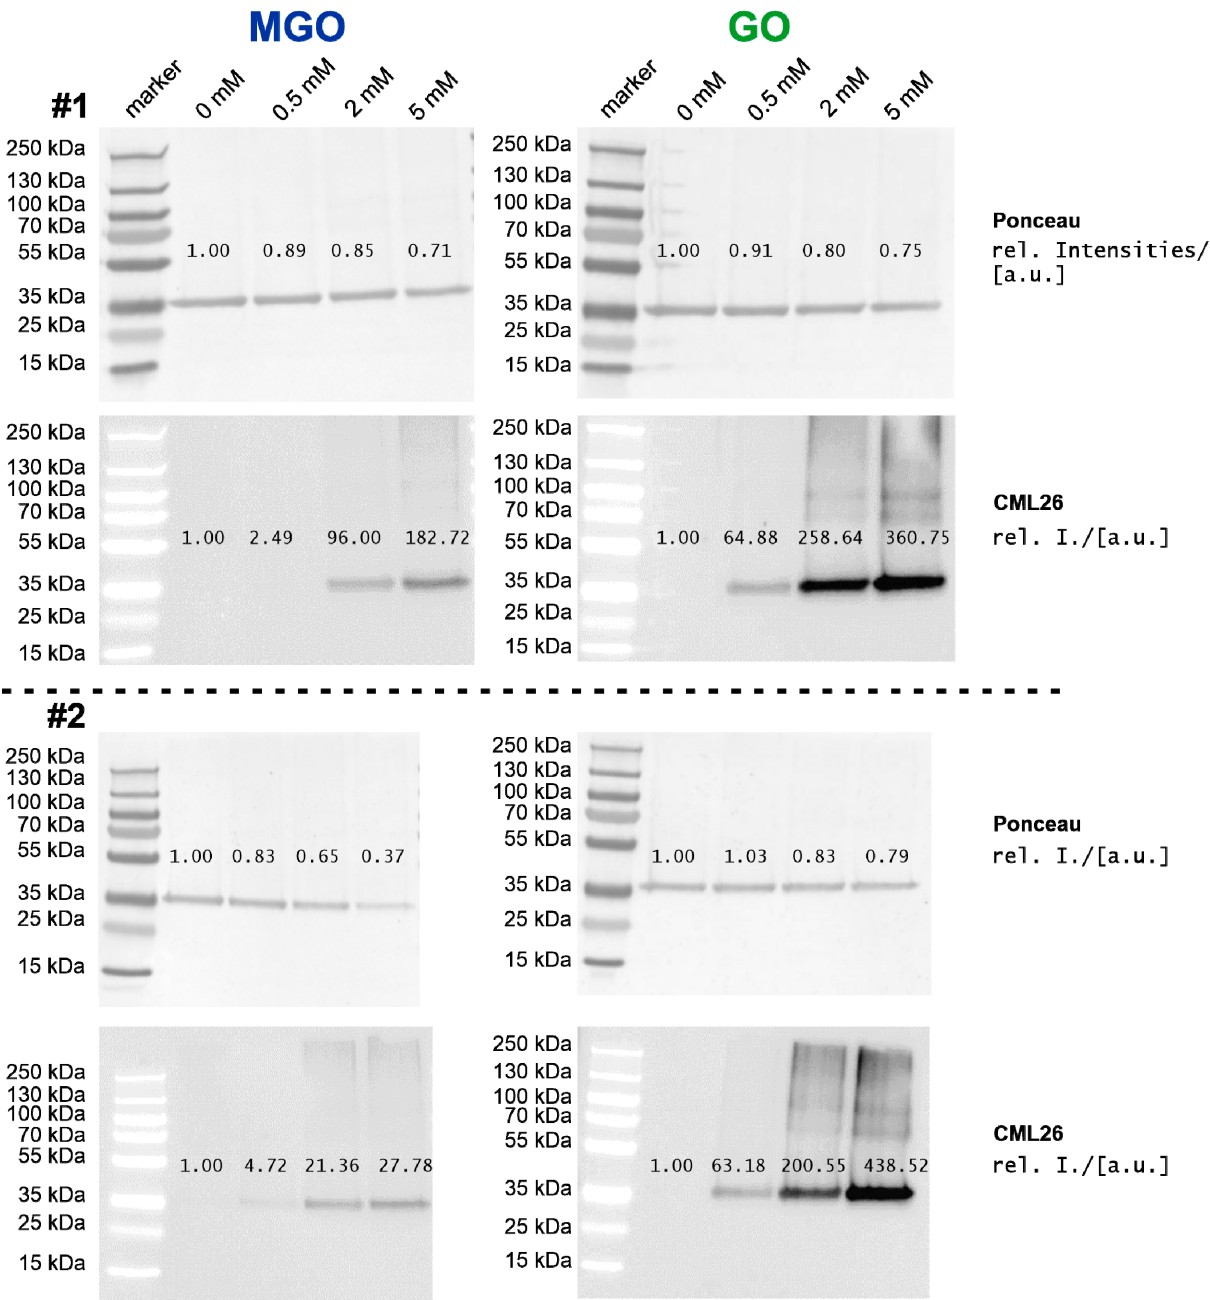



Supplementary Figure S3:

N-acetylglucosamine kinase (GlcNAc kinase):

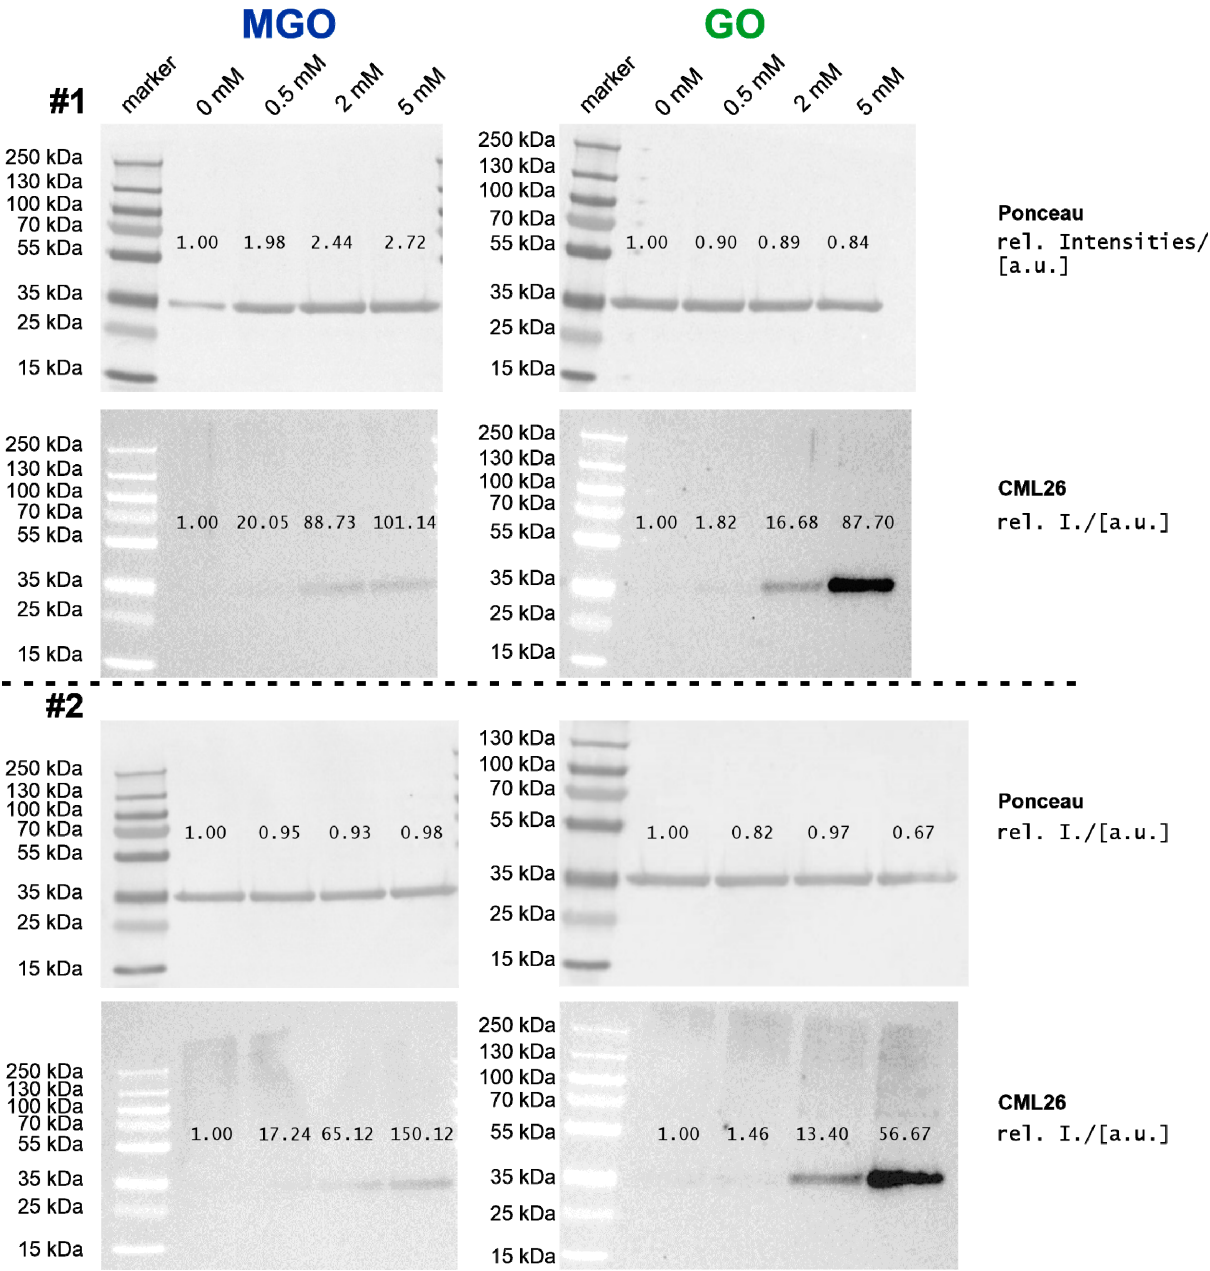

Supplementary Table S2:

UDP-*N*-acetylglucosamine 2-epimerase activity assay:

| UDP-Konzentration               | neg. ctrl. | pos. ctrl. | 0.5 mM MGO | 2 mM MGO  | 5 mM MGO  | 0.5 mM GO | 2 mM GO   | 5 mM GO   |
|---------------------------------|------------|------------|------------|-----------|-----------|-----------|-----------|-----------|
| mean/nM                         | 26.19 nM   | 169.49 nM  | 142.88 nM  | 125.95 nM | 102.19 nM | 120.60 nM | 109.63 nM | 106.71 nM |
| median/nM                       | 17.26 nM   | 158.98 nM  | 126.48 nM  | 123.85 nM | 107.55 nM | 119.32 nM | 107.93 nM | 106.44 nM |
| standard deviation/<br>nM       | 15.66 nM   | 44.16 nM   | 27.33 nM   | 16.17 nM  | 13.37 nM  | 11.88 nM  | 7.22 nM   | 8.65 nM   |
| standard error/<br>nM           | 7.00 nM    | 19.75 nM   | 12.22 nM   | 7.23 nM   | 5.98 nM   | 5.31 nM   | 3.23 nM   | 3.87 nM   |
| minimum/nM                      | 13.34 nM   | 127.75 nM  | 119.90 nM  | 111.39 nM | 86.33 nM  | 103.99 nM | 103.66 nM | 95.72 nM  |
| maximum/nM                      | 47.15 nM   | 237.90 nM  | 173.36 nM  | 150.10 nM | 118.24 nM | 136.84 nM | 121.35 nM | 118.67 nM |
| interquartile range<br>(IQR)/nM | 24.35 nM   | 47.68 nM   | 49.44 nM   | 20.90 nM  | 17.98 nM  | 6.64 nM   | 6.95 nM   | 8.41 nM   |

Supplementary Table S3:

Two-Way analysis of variance (ANOVA) of the UDP-*N*-acetylglucosamine 2-epimerase activity assay:

| factor                            | <i>p</i> -value | significance asterisks |
|-----------------------------------|-----------------|------------------------|
| concentration                     | 1.43E-03        | ***                    |
| glycation substance               | 1.96E-01        | -                      |
| concentration*glycation substance | 3.58E-03        | ***                    |

Supplementary Table S4:

Tukey *post hoc*-test of the UDP-*N*-acetylglucosamine 2-epimerase activity assay:

| condition A       | condition B      | <i>p</i> -value | significance asterisks |
|-------------------|------------------|-----------------|------------------------|
| <b>0.5 mM MGO</b> | <b>2 mM MGO</b>  | 2.22E-01        | -                      |
| <b>0.5 mM MGO</b> | <b>5 mM MGO</b>  | 5.86E-03        | **                     |
| <b>2 mM MGO</b>   | <b>5 mM MGO</b>  | 7.76E-02        | -                      |
| <b>0.5 mM GO</b>  | <b>2 mM GO</b>   | 4.95E-01        | -                      |
| <b>0.5 mM GO</b>  | <b>5 mM GO</b>   | 3.42E-01        | -                      |
| <b>2 mM GO</b>    | <b>5 mM GO</b>   | 9.47E-01        | -                      |
| <b>MGO</b>        | <b>GO</b>        | 1.01E-01        | -                      |
| <b>0.5 mM</b>     | <b>2 mM</b>      | 1.46E-01        | -                      |
| <b>0.5 mM</b>     | <b>5 mM</b>      | 7.91E-03        | **                     |
| <b>2 mM</b>       | <b>5 mM</b>      | 1.67E-01        | -                      |
| <b>0.5 mM MGO</b> | <b>0.5 mM GO</b> | 4.32E-02        | *                      |
| <b>2 mM MGO</b>   | <b>2 mM GO</b>   | 1.17E-01        | -                      |
| <b>5 mM MGO</b>   | <b>5 mM GO</b>   | 6.40E-01        | -                      |

Supplementary Table S5:

Student's *t*-test of the UDP-*N*-acetylglucosamine 2-epimerase activity assay:

| condition A      | condition B      | <i>p</i> -value | significance asterisks |
|------------------|------------------|-----------------|------------------------|
| positive control | negative control | 3.47E-03        | ***                    |
| positive control | 0.5 mM MGO       | 1.77E-01        | -                      |
| positive control | 2 mM MGO         | 3.19E-02        | *                      |
| positive control | 5 mM MGO         | 1.70E-02        | *                      |
| positive control | 0.5 mM GO        | 3.34E-02        | *                      |
| positive control | 2 mM GO          | 4.46E-02        | *                      |
| positive control | 5 mM GO          | 4.03E-02        | *                      |
| negative control | 0.5 mM MGO       | 2.49E-03        | ***                    |
| negative control | 2 mM MGO         | 1.23E-03        | ***                    |
| negative control | 5 mM MGO         | 4.05E-03        | ***                    |
| negative control | 0.5 mM GO        | 3.90E-04        | ***                    |
| negative control | 2 mM GO          | 1.51E-04        | ***                    |
| negative control | 5 mM GO          | 3.79E-04        | ***                    |

Supplementary Table S6:

N-acetylmannosamine kinase activity assay – NADH consumption:

| NADH-consumption                                    | neg. ctrl.                   | pos. ctrl.                    | 0.5 mM MGO                    | 2 mM MGO                      | 5 mM MGO                      | 0.5 mM GO                     | 2 mM GO                       | 5 mM GO                       |
|-----------------------------------------------------|------------------------------|-------------------------------|-------------------------------|-------------------------------|-------------------------------|-------------------------------|-------------------------------|-------------------------------|
| mean/fmol·min <sup>-1</sup>                         | 29.62 fmol·min <sup>-1</sup> | 556.97 fmol·min <sup>-1</sup> | 407.03 fmol·min <sup>-1</sup> | 169.69 fmol·min <sup>-1</sup> | 74.97 fmol·min <sup>-1</sup>  | 495.50 fmol·min <sup>-1</sup> | 274.65 fmol·min <sup>-1</sup> | 122.51 fmol·min <sup>-1</sup> |
| median/fmol·min <sup>-1</sup>                       | 18.29 fmol·min <sup>-1</sup> | 557.70 fmol·min <sup>-1</sup> | 411.42 fmol·min <sup>-1</sup> | 170.05 fmol·min <sup>-1</sup> | 73.14 fmol·min <sup>-1</sup>  | 522.96 fmol·min <sup>-1</sup> | 274.28 fmol·min <sup>-1</sup> | 115.20 fmol·min <sup>-1</sup> |
| standard deviation/<br>fmol·min <sup>-1</sup>       | 26.61 fmol·min <sup>-1</sup> | 43.07 fmol·min <sup>-1</sup>  | 14.94 fmol·min <sup>-1</sup>  | 42.46 fmol·min <sup>-1</sup>  | 28.74 fmol·min <sup>-1</sup>  | 52.51 fmol·min <sup>-1</sup>  | 27.35 fmol·min <sup>-1</sup>  | 22.09 fmol·min <sup>-1</sup>  |
| standard error/<br>fmol·min <sup>-1</sup>           | 11.90 fmol·min <sup>-1</sup> | 19.26 fmol·min <sup>-1</sup>  | 6.68 fmol·min <sup>-1</sup>   | 18.99 fmol·min <sup>-1</sup>  | 12.85 fmol·min <sup>-1</sup>  | 23.48 fmol·min <sup>-1</sup>  | 12.23 fmol·min <sup>-1</sup>  | 9.88 fmol·min <sup>-1</sup>   |
| minimum/fmol·min <sup>-1</sup>                      | 5.49 fmol·min <sup>-1</sup>  | 508.33 fmol·min <sup>-1</sup> | 389.48 fmol·min <sup>-1</sup> | 113.37 fmol·min <sup>-1</sup> | 32.91 fmol·min <sup>-1</sup>  | 427.88 fmol·min <sup>-1</sup> | 241.37 fmol·min <sup>-1</sup> | 100.57 fmol·min <sup>-1</sup> |
| maximum/fmol·min <sup>-1</sup>                      | 65.83 fmol·min <sup>-1</sup> | 614.39 fmol·min <sup>-1</sup> | 422.39 fmol·min <sup>-1</sup> | 217.60 fmol·min <sup>-1</sup> | 106.06 fmol·min <sup>-1</sup> | 544.90 fmol·min <sup>-1</sup> | 312.68 fmol·min <sup>-1</sup> | 155.43 fmol·min <sup>-1</sup> |
| interquartile range<br>(IQR)/fmol·min <sup>-1</sup> | 40.23 fmol·min <sup>-1</sup> | 58.51 fmol·min <sup>-1</sup>  | 25.60 fmol·min <sup>-1</sup>  | 58.51 fmol·min <sup>-1</sup>  | 31.09 fmol·min <sup>-1</sup>  | 80.46 fmol·min <sup>-1</sup>  | 29.26 fmol·min <sup>-1</sup>  | 25.60 fmol·min <sup>-1</sup>  |

Supplementary Table S7:

Two-Way analysis of variance (ANOVA) of the *N*-acetylmannosamine kinase activity assay:

| factor                            | p-value  | significance asterisks |
|-----------------------------------|----------|------------------------|
| concentration                     | 4.11E-04 | ***                    |
| glycation substance               | 2.42E-03 | ***                    |
| concentration*glycation substance | 1.22E-01 | -                      |

Supplementary Table S8:

Tukey *post hoc*-test of the *N*-acetylmannosamine kinase activity assay – NADH consumption:

| condition A       | condition B      | p-value  | significance asterisks |
|-------------------|------------------|----------|------------------------|
| <b>0.5 mM MGO</b> | <b>2 mM MGO</b>  | 4.27E-06 | ***                    |
| <b>0.5 mM MGO</b> | <b>5 mM MGO</b>  | 2.72E-07 | ***                    |
| <b>2 mM MGO</b>   | <b>5 mM MGO</b>  | 2.82E-03 | ***                    |
| <b>0.5 mM GO</b>  | <b>2 mM GO</b>   | 7.31E-06 | ***                    |
| <b>0.5 mM GO</b>  | <b>5 mM GO</b>   | 7.67E-08 | ***                    |
| <b>2 mM GO</b>    | <b>5 mM GO</b>   | 1.18E-04 | ***                    |
| <b>MGO</b>        | <b>GO</b>        | 1.64E-03 | ***                    |
| <b>0.5 mM</b>     | <b>2 mM</b>      | 3.38E-07 | ***                    |
| <b>0.5 mM</b>     | <b>5 mM</b>      | 0        | ***                    |
| <b>2 mM</b>       | <b>5 mM</b>      | 4.33E-05 | ***                    |
| <b>0.5 mM MGO</b> | <b>0.5 mM GO</b> | 1.64E-03 | ***                    |
| <b>2 mM MGO</b>   | <b>2 mM GO</b>   | 5.79E-04 | ***                    |
| <b>5 mM MGO</b>   | <b>5 mM GO</b>   | 3.76E-02 | *                      |

Supplementary Table S9:

Student's *t*-test of the *N*-acetylmannosamine kinase activity assay – NADH consumption:

| condition A      | condition B      | <i>p</i> -value | significance asterisks |
|------------------|------------------|-----------------|------------------------|
| positive control | negative control | 1.40E-02        | *                      |
| positive control | 0.5 mM MGO       | 1.32E-03        | ***                    |
| positive control | 2 mM MGO         | 8.23E-06        | ***                    |
| positive control | 5 mM MGO         | 8.23E-06        | ***                    |
| positive control | 0.5 mM GO        | 1.19E-01        | -                      |
| positive control | 2 mM GO          | 1.80E-04        | ***                    |
| positive control | 5 mM GO          | 3.46E-06        | ***                    |
| negative control | 0.5 mM MGO       | 3.30E-02        | *                      |
| negative control | 2 mM MGO         | 1.82E-01        | -                      |
| negative control | 5 mM MGO         | 3.59E-01        | -                      |
| negative control | 0.5 mM GO        | 1.71E-02        | *                      |
| negative control | 2 mM GO          | 8.33E-02        | -                      |
| negative control | 5 mM GO          | 2.23E-01        | -                      |

Supplementary Table S10:

N-acetylglucosamine kinase activity assay – NADH consumption:

|                                                     | neg. ctrl.                   | pos. ctrl.                    | 0.5 mM MGO                   | 2 mM MGO                     | 5 mM MGO                     | 0.5 mM GO                     | 2 mM GO                       | 5 mM GO                       |
|-----------------------------------------------------|------------------------------|-------------------------------|------------------------------|------------------------------|------------------------------|-------------------------------|-------------------------------|-------------------------------|
| mean/fmol·min <sup>-1</sup>                         | 12.89 fmol·min <sup>-1</sup> | 93.35 fmol·min <sup>-1</sup>  | 89.23 fmol·min <sup>-1</sup> | 79.08 fmol·min <sup>-1</sup> | 82.01 fmol·min <sup>-1</sup> | 88.87 fmol·min <sup>-1</sup>  | 87.40 fmol·min <sup>-1</sup>  | 89.69 fmol·min <sup>-1</sup>  |
| median/fmol·min <sup>-1</sup>                       | 16.91 fmol·min <sup>-1</sup> | 84.57 fmol·min <sup>-1</sup>  | 87.31 fmol·min <sup>-1</sup> | 80.00 fmol·min <sup>-1</sup> | 80.91 fmol·min <sup>-1</sup> | 85.48 fmol·min <sup>-1</sup>  | 79.54 fmol·min <sup>-1</sup>  | 80.46 fmol·min <sup>-1</sup>  |
| standard deviation/<br>fmol·min <sup>-1</sup>       | 9.95 fmol·min <sup>-1</sup>  | 37.80 fmol·min <sup>-1</sup>  | 5.10 fmol·min <sup>-1</sup>  | 6.68 fmol·min <sup>-1</sup>  | 5.24 fmol·min <sup>-1</sup>  | 9.51 fmol·min <sup>-1</sup>   | 12.30 fmol·min <sup>-1</sup>  | 23.41 fmol·min <sup>-1</sup>  |
| standard error/<br>fmol·min <sup>-1</sup>           | 4.45 fmol·min <sup>-1</sup>  | 16.90 fmol·min <sup>-1</sup>  | 2.28 fmol·min <sup>-1</sup>  | 2.99 fmol·min <sup>-1</sup>  | 2.34 fmol·min <sup>-1</sup>  | 4.25 fmol·min <sup>-1</sup>   | 5.50 fmol·min <sup>-1</sup>   | 10.47 fmol·min <sup>-1</sup>  |
| minimum/fmol·min <sup>-1</sup>                      | -2.29 fmol·min <sup>-1</sup> | 67.66 fmol·min <sup>-1</sup>  | 83.66 fmol·min <sup>-1</sup> | 69.94 fmol·min <sup>-1</sup> | 76.80 fmol·min <sup>-1</sup> | 77.71 fmol·min <sup>-1</sup>  | 76.34 fmol·min <sup>-1</sup>  | 65.83 fmol·min <sup>-1</sup>  |
| maximum/fmol·min <sup>-1</sup>                      | 21.94 fmol·min <sup>-1</sup> | 159.08 fmol·min <sup>-1</sup> | 96.91 fmol·min <sup>-1</sup> | 85.94 fmol·min <sup>-1</sup> | 90.51 fmol·min <sup>-1</sup> | 100.11 fmol·min <sup>-1</sup> | 101.03 fmol·min <sup>-1</sup> | 127.54 fmol·min <sup>-1</sup> |
| interquartile range<br>(IQR)/fmol·min <sup>-1</sup> | 11.43 fmol·min <sup>-1</sup> | 18.29 fmol·min <sup>-1</sup>  | 4.57 fmol·min <sup>-1</sup>  | 9.60 fmol·min <sup>-1</sup>  | 3.66 fmol·min <sup>-1</sup>  | 13.71 fmol·min <sup>-1</sup>  | 21.03 fmol·min <sup>-1</sup>  | 13.71 fmol·min <sup>-1</sup>  |



Supplementary Table S11:

Two-Way analysis of variance (ANOVA) of the *N*-acetylglucosamine kinase activity assay:

| factor                            | p-value  | significance asterisks |
|-----------------------------------|----------|------------------------|
| concentration                     | 1.59E-01 | -                      |
| glycation substance               | 2.98E-01 | -                      |
| concentration*glycation substance | 8.75E-02 | -                      |

Supplementary Table S12:

Tukey *post hoc*-test of the *N*-acetylglucosamine kinase activity assay – NADH consumption:

| condition A       | condition B      | p-value  | significance asterisks |
|-------------------|------------------|----------|------------------------|
| <b>0.5 mM MGO</b> | <b>2 mM MGO</b>  | 4.20E-01 | -                      |
| <b>0.5 mM MGO</b> | <b>5 mM MGO</b>  | 6.29E-01 | -                      |
| <b>2 mM MGO</b>   | <b>5 mM MGO</b>  | 9.23E-01 | -                      |
| <b>0.5 mM GO</b>  | <b>2 mM GO</b>   | 9.80E-01 | -                      |
| <b>0.5 mM GO</b>  | <b>5 mM GO</b>   | 9.94E-01 | -                      |
| <b>2 mM GO</b>    | <b>5 mM GO</b>   | 9.52E-01 | -                      |
| <b>MGO</b>        | <b>GO</b>        | 3.03E-01 | -                      |
| <b>0.5 mM</b>     | <b>2 mM</b>      | 5.55E-01 | -                      |
| <b>0.5 mM</b>     | <b>5 mM</b>      | 8.28E-01 | -                      |
| <b>2 mM</b>       | <b>5 mM</b>      | 8.81E-01 | -                      |
| <b>0.5 mM MGO</b> | <b>0.5 mM GO</b> | 9.63E-01 | -                      |
| <b>2 mM MGO</b>   | <b>2 mM GO</b>   | 3.08E-01 | -                      |
| <b>5 mM MGO</b>   | <b>5 mM GO</b>   | 3.44E-01 | -                      |

Supplementary Table S13:

Student's *t*-test of the *N*-acetylglucosamine kinase activity assay – NADH consumption:

| condition A      | condition B      | <i>p</i> -value | significance asterisks |
|------------------|------------------|-----------------|------------------------|
| positive control | negative control | 7.59E-03        | **                     |
| positive control | 0.5 mM MGO       | 8.32E-01        | -                      |
| positive control | 2 mM MGO         | 4.64E-01        | -                      |
| positive control | 5 mM MGO         | 5.43E-01        | -                      |
| positive control | 0.5 mM GO        | 8.33E-01        | -                      |
| positive control | 2 mM GO          | 7.84E-01        | -                      |
| positive control | 5 mM GO          | 7.47E-01        | -                      |
| negative control | 0.5 mM MGO       | 1.16E-04        | ***                    |
| negative control | 2 mM MGO         | 6.81E-04        | ***                    |
| negative control | 5 mM MGO         | 2.19E-04        | ***                    |
| negative control | 0.5 mM GO        | 8.52E-04        | ***                    |
| negative control | 2 mM GO          | 1.55E-03        | ***                    |
| negative control | 5 mM GO          | 1.85E-03        | ***                    |

Supplementary Figure S4:  
Unprocessed C2C12 cell culture images.

**A** 10x magnification 20x magnification

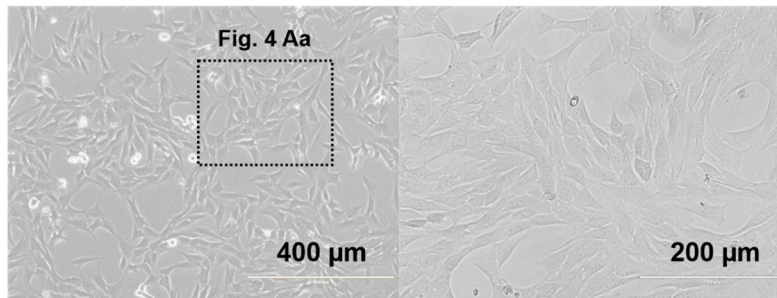

control

**B** 10x magnification 20x magnification

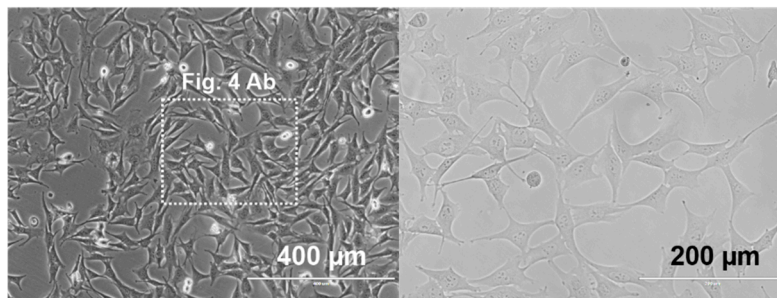

0.2 mM MGO

**C** 10x magnification 20x magnification

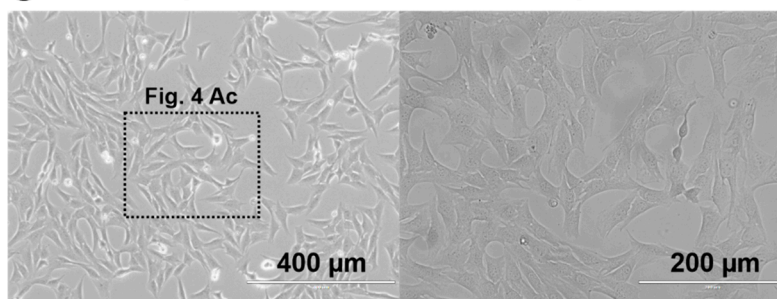

0.2 mM GO

**D** 10x magnification 20x magnification

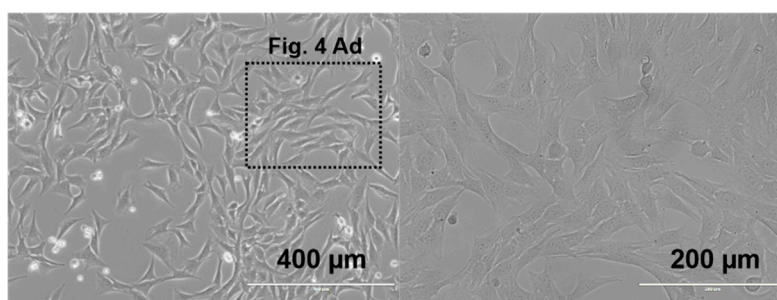

0.5 mM GO

Supplementary Figure S5:  
Western Blots C2C12-cell culture

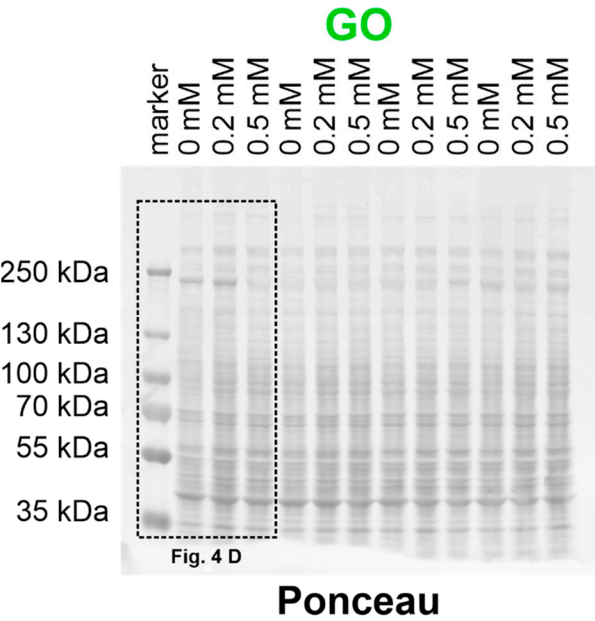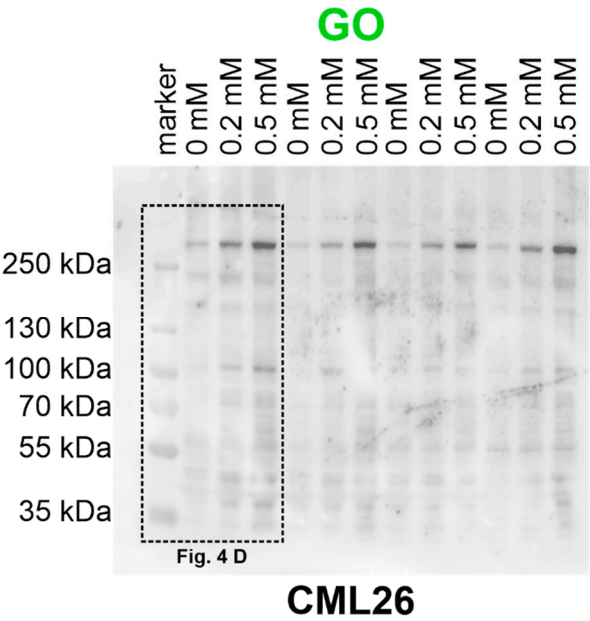

normalized to Ponceau (n=4):

|                                   | 0 mM | 0.2 mM | 0.5 mM |
|-----------------------------------|------|--------|--------|
| mean/relative b.i.                | 1.00 | 1.38   | 2.10   |
| standard deviation/ relative b.i. | 0.00 | 0.11   | 0.54   |

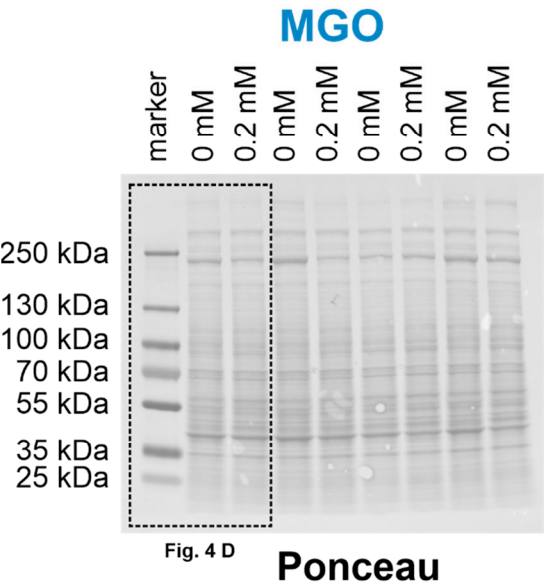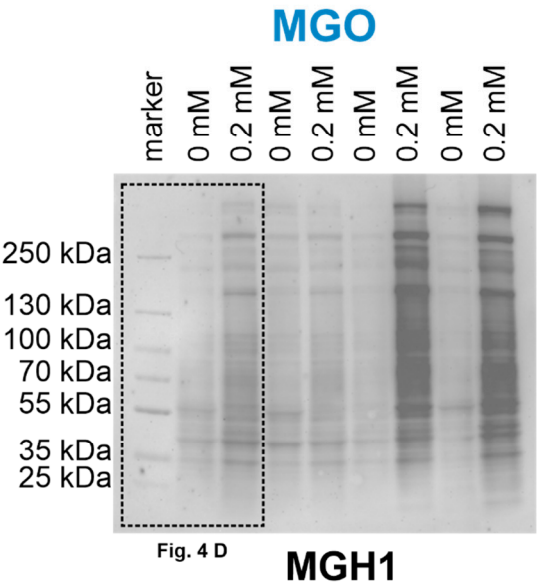

normalized to Ponceau (n=4):

|                                  | 0 mM | 0.2 mM |
|----------------------------------|------|--------|
| mean/relative b.i.               | 1.00 | 14.22  |
| standard deviation/relative b.i. | 0.00 | 14.71  |

Supplementary Table S14:  
Results from the MTT-Assay

| GO               |           |                         |
|------------------|-----------|-------------------------|
| concentration/mM | mean/a.u. | standard deviation/a.u. |
| 0 mM             | 1.00 a.u. | 0.00 a.u.               |
| 0.5 mM           | 1.09 a.u. | 0.09 a.u.               |
| 1 mM             | 0.90 a.u. | 0.12 a.u.               |
| 1.5 mM           | 0.93 a.u. | 0.09 a.u.               |
| 2 mM             | 0.83 a.u. | 0.05 a.u.               |
| 2.5 mM           | 0.77 a.u. | 0.01 a.u.               |
| MGO              |           |                         |
| concentration/mM | mean/a.u. | standard deviation/a.u. |
| 0 mM             | 1.00 a.u. | 0.00 a.u.               |
| 0.1 mM           | 1.10 a.u. | 0.09 a.u.               |
| 0.2 mM           | 1.04 a.u. | 0.08 a.u.               |
| 0.5 mM           | 0.85 a.u. | 0.09 a.u.               |
| 0.75 mM          | 0.58 a.u. | 0.06 a.u.               |
| 1 mM             | 0.32 a.u. | 0.07 a.u.               |

Supplementary Table S15:  
*p*-values MTT-Assay

| condition A | condition B | <i>p</i> -value | significance asterisks |
|-------------|-------------|-----------------|------------------------|
| control     | 0.5 mM GO   | 3.10E-01        | -                      |
| control     | 1 mM GO     | 3.60E-01        | -                      |
| control     | 1.5 mM GO   | 3.84E-01        | -                      |
| control     | 2 mM GO     | 3.37E-02        | *                      |
| control     | 2.5 mM GO   | 6.00E-04        | ***                    |
| control     | 0.1 mM MGO  | 2.81E-01        | -                      |
| control     | 0.2 mM MGO  | 5.37E-01        | -                      |
| control     | 0.5 mM MGO  | 1.38E-01        | -                      |
| control     | 0.75 mM MGO | 1.07E-02        | *                      |
| control     | 1 mM MGO    | 5.00E-03        | ***                    |

Supplementary Table S16:  
Results from the qPCR (Control and 0.5 mM GO):

| Cq-value             |         |        |        |        |           |        |        |        |
|----------------------|---------|--------|--------|--------|-----------|--------|--------|--------|
|                      | Control |        |        |        | 0.5 mM GO |        |        |        |
| <b>RPL 26</b>        | 16.32   | 16.22  | 15.70  | 15.69  | 16.15     | 16.18  | 15.52  | 15.47  |
| <b>GAPDH</b>         | 15.16   | 15.64  | 14.96  | 14.93  | 15.42     | 15.62  | 14.69  | 14.71  |
| <b>GNE Isoform 1</b> | 31.72   | 31.77  | 31.38  | 30.28  | 31.36     | 31.39  | 31.22  | 31.04  |
| <b>GNE Isoform 2</b> | 27.51   | 29.41  | 28.54  | 28.30  | 29.90     | 29.93  | 30.48  | 29.38  |
| <b>GlcNAcKinase</b>  | 21.51   | 21.59  | 21.42  | 20.82  | 21.85     | 22.02  | 21.51  | 21.11  |
| <b>GNE</b>           | 22.98   | 23.36  | 22.50  | 22.31  | 23.24     | 23.74  | 22.58  | 22.33  |
| dCq-value            |         |        |        |        |           |        |        |        |
| <b>RPL 26</b>        | -1.16   | -0.57  | -0.74  | -0.75  | -0.73     | -0.56  | -0.83  | -0.76  |
| <b>GAPDH</b>         | 15.40   | 15.55  | 15.68  | 14.59  | 15.21     | 15.21  | 15.70  | 15.57  |
| <b>GNE Isoform 1</b> | 11.19   | 13.20  | 12.84  | 12.62  | 13.75     | 13.76  | 14.96  | 13.91  |
| <b>GNE Isoform 2</b> | 5.19    | 5.38   | 5.72   | 5.13   | 5.70      | 5.84   | 5.99   | 5.64   |
| <b>GlcNAcKinase</b>  | 6.66    | 7.14   | 6.80   | 6.63   | 7.09      | 7.56   | 7.06   | 6.86   |
| <b>GNE</b>           | -16.32  | -16.22 | -15.70 | -15.69 | -16.15    | -16.18 | -15.52 | -15.47 |
| ddCq-value           |         |        |        |        |           |        |        |        |
| <b>RPL 26</b>        | 0.00    | 0.00   | 0.00   | 0.00   | 0.00      | 0.00   | 0.00   | 0.00   |
| <b>GAPDH</b>         | -0.35   | 0.23   | 0.07   | 0.05   | 0.08      | 0.25   | -0.03  | 0.05   |
| <b>GNE Isoform 1</b> | 0.09    | 0.25   | 0.38   | -0.71  | -0.10     | -0.09  | 0.39   | 0.26   |
| <b>GNE Isoform 2</b> | -1.27   | 0.74   | 0.38   | 0.16   | 1.29      | 1.30   | 2.50   | 1.45   |
| <b>GlcNAc Kinase</b> | -0.17   | 0.02   | 0.36   | -0.22  | 0.35      | 0.49   | 0.63   | 0.28   |
| <b>GNE</b>           | -0.15   | 0.34   | -0.01  | -0.18  | 0.29      | 0.75   | 0.25   | 0.05   |
| FC (fold change)     |         |        |        |        |           |        |        |        |
| <b>RPL 26</b>        | 1.00    | 1.00   | 1.00   | 1.00   | 1.00      | 1.00   | 1.00   | 1.00   |
| <b>GAPDH</b>         | 1.28    | 0.85   | 0.95   | 0.96   | 0.95      | 0.84   | 1.02   | 0.97   |
| <b>GNE Isoform 1</b> | 0.94    | 0.84   | 0.77   | 1.64   | 1.07      | 1.07   | 0.76   | 0.83   |
| <b>GNE Isoform 2</b> | 2.41    | 0.60   | 0.77   | 0.90   | 0.41      | 0.41   | 0.18   | 0.37   |
| <b>GlcNAc Kinase</b> | 1.12    | 0.98   | 0.78   | 1.16   | 0.78      | 0.71   | 0.65   | 0.82   |
| <b>GNE</b>           | 1.11    | 0.79   | 1.00   | 1.13   | 0.82      | 0.59   | 0.84   | 0.97   |

Supplementary Table S17:  
*p*-values qPCR – GlcNAc kinase:

| condition A | condition B | <i>p</i> -value | significance asterisks |
|-------------|-------------|-----------------|------------------------|
| control     | 0.2 mM MGO  | 5.49E-02        | -                      |
| control     | 0.2 mM GO   | 8.61E-01        | -                      |
| control     | 0.5 mM GO   | 4.56E-02        | *                      |

*p*-values qPCR – GNE:

| condition A | condition B | <i>p</i> -value | significance asterisks |
|-------------|-------------|-----------------|------------------------|
| control     | 0.2 mM MGO  | 1.32E-01        | -                      |
| control     | 0.2 mM GO   | 6.41E-01        | -                      |
| control     | 0.5 mM GO   | 1.11E-01        | -                      |

Supplementary Table S18:

UniProt-based analysis of mutations and their effect on potential glycation sites

<https://www.uniprot.org> – searching for: “Q9Y223” – 07.12.2022

We filtered the mutations based on following parameters: “likely disease” + “missense” + “not sialuria”.

First column: **E:** Epimerase domain, or **K:** Kinase domain

Second Column: **S:** Sheet, **H:** Helix, or **L:** Loop;

Fifth Column: **Blue:** basic amino acid, **Red:** acidic amino acid,  
**Yellow:** polar amino acid, or **Green:** apolar amino acid.

(A)

Reduction of a potential glycation site

|   |   | dbSNP        | Position | Change | PolyPhen-Score/Clinical significance |
|---|---|--------------|----------|--------|--------------------------------------|
| E | S | rs1401082364 | 11       | R>Q    | 0.086 (benign)                       |
| E | S | rs769716748  | 11       | R>W    | 0.73 (possibly damaging)             |
| E | S | rs1209266607 | 13       | C>S    | 0.262 (benign)                       |
| E | S | rs886044539  | 71       | R>W    | 0.669 (possible damaging)            |
| E | S | rs748704459  | 129      | R>Q    | 0.985 (probably damaging)            |
| E | H | rs1157107103 | 152      | K>T    | 0.999 (probably damaging)            |
| E | S | rs772597073  | 177      | R>H    | 0.156 (benign)                       |
| E | S | rs121908629  | 246      | R>Q    | Likely pathogenic                    |
| E | S | rs773729410  | 246      | R>W    | Likely pathogenic                    |
| E | L | rs121908633  | 303      | C>V    | Likely pathogenic                    |
| E | L | rs1455785164 | 306      | R>Q    | Likely pathogenic                    |
| E | S | rs150132839  | 335      | R>W    | 0.94 (probably damaging)             |
| E | L | rs1554660090 | 353      | K>E    | 0.916 (probably damaging)            |
| E | H | rs1828924556 | 375      | K>T    | Variant of uncertain significance    |
| E | L | rs1828920194 | 386      | K>N    | Variant of uncertain significance    |
| E | L | rs1180382282 | 386      | K>Q    | 0.003 (benign)                       |
| K | S | rs780092539  | 420      | R>Q    | 0.957 (probably damaging)            |
| K | S | rs138357804  | 481      | R>Q    | 0.001 (benign)                       |
| K | H | rs139347806  | 684      | R>S    | 0 (benign)                           |

(B)

No change in the number of potential glycation sites

|   |   | dbSNP       | Position | Change | PolyPhen-Score/Clinical significance |
|---|---|-------------|----------|--------|--------------------------------------|
| E | L | rs148523065 | 101      | R>C    | 0.98 (probably damaging)             |
| E | H | rs769215411 | 162      | R>C    | Likely pathogenic                    |
| E | S | rs539332585 | 177      | R>C    | Likely pathogenic                    |
| E | S | rs762106720 | 277      | R>C    | 0.877 (possibly damaging)            |
| K | H | rs139347806 | 684      | R>C    | 0.118 (benign)                       |



(C)

Addition of one potential glycation site

|   |   | dbSNP        | Position | Change | PolyPhen-Score/Clinical significance |
|---|---|--------------|----------|--------|--------------------------------------|
| E | S | rs886043739  | 110      | H>R    | 0.998 (probably damaging)            |
| E | L | rs755743750  | 304      | G>R    | 0.997 (probably damaging)            |
| K | S | rs866841518  | 416      | G>R    | 1 (probably damaging)                |
| K | S | rs1313840587 | 423      | I>R    | possibly damaging (0.9)              |
| K | S | rs1828703850 | 429      | E>K    | Variant of uncertain significance    |
| K | H | rs1337925138 | 443      | E>K    | 0.119 (benign)                       |
| K | L | rs986773986  | 528      | F>C    | Likely pathogenic                    |
| K | L | rs762009737  | 559      | G>R    | 1 (probably damaging)                |
| K | S | rs1828512489 | 577      | P>R    | Variant of uncertain significance    |
| K | S | rs776384541  | 669      | G>R    | 0.999 (probably damaging)            |
